# Supplementary material for: Survey of endocrinologists managing recovery from anabolic androgenic steroid induced hypogonadism
Source: PubMed Central journal article supplement (PMC9986377; doi:10.1530/raf-22-0097), 2023-02-27
Supplement: supplementary_table_1.pdf [file supplementary_table_1.pdf]

**Supplemental Table 1: Content of online study survey to endocrinology clinicians.**

|                                                                                                                                                                                                                                                                                                                                                                                                           |
|-----------------------------------------------------------------------------------------------------------------------------------------------------------------------------------------------------------------------------------------------------------------------------------------------------------------------------------------------------------------------------------------------------------|
| <p>1. Have you ever seen someone who recently stopped taking anabolic steroids?</p> <ul style="list-style-type: none"><li>• Yes</li><li>• No</li></ul>                                                                                                                                                                                                                                                    |
| <p>2. What symptoms did they complain of? (Tick all that apply)</p> <ul style="list-style-type: none"><li>• I don't remember</li><li>• They had no symptoms</li><li>• Cravings to restart anabolic steroid use</li><li>• Low mood</li><li>• Anxiety</li><li>• Reduced sex drive</li><li>• Tiredness</li><li>• Suicidal thoughts</li><li>• Headaches</li><li>• Physical weakness</li><li>• Other</li></ul> |
| <p>3. How did you manage them?</p> <ul style="list-style-type: none"><li>• Told them to wait until their symptoms recovered</li><li>• Gave them hormonal treatment</li><li>• Other</li></ul>                                                                                                                                                                                                              |
| <p>4. When had they last taken anabolic steroids?</p> <ul style="list-style-type: none"><li>• Less than 3 months</li><li>• 3-6 months</li><li>• 6-12 months</li><li>• Over 12 months</li></ul>                                                                                                                                                                                                            |
| <p>5. What happened to your patient?</p> <ul style="list-style-type: none"><li>• They still come to clinic and their symptoms have gone</li><li>• They still come to clinic, but they still have symptoms</li><li>• They stopped coming to clinic because their symptoms went away</li><li>• They stopped coming to clinic, but they still had symptoms</li></ul>                                         |
| <p>6. How confident are you treating men stopping anabolic steroids?</p> <ul style="list-style-type: none"><li>• 1-5 (Not confident at all to extremely confident).</li></ul>                                                                                                                                                                                                                             |
